# Supplementary material for: Selective Cdk9 inhibition resolves neutrophilic inflammation and enhances cardiac regeneration in larval zebrafish
Source: Oxford University Press journal article supplement (doi:10.1242/dev.199636), 2021-09-15
Supplement: dev199636supp.pdf [file dev199636supp.pdf]

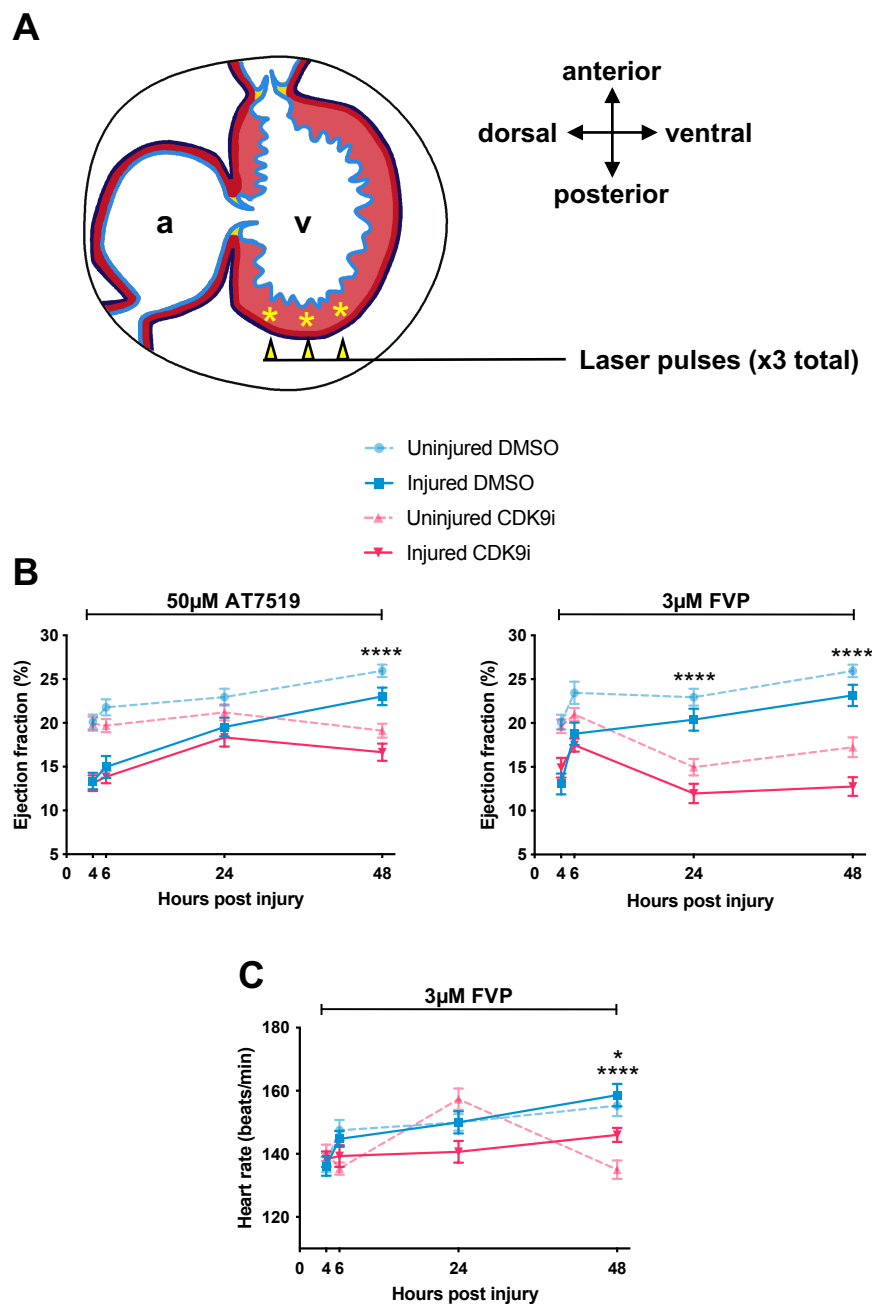

**Fig. S1. Continuous CDK9i treatment reduces heart function. (A)** Schematic illustrating the method of cardiac injury by laser pulsing along the ventricular apex of 3 dpf zebrafish larval hearts. Asterisks indicate the three sites of laser injury. Atrium = a and ventricle = v. **(B)** Ventricular ejection fraction (%) at 4 hpi, 6 hpi, 24 hpi and 48 hpi with  $\leq 0.3\%$  DMSO vehicle, 50 $\mu$ M AT7519 (left graph) or 3 $\mu$ M FVP (right graph). Error bars = SEM,  $n = 18$  larvae, experimental  $n = 3$ . Two-way ANOVA and Bonferroni *post hoc* test performed for comparisons between DMSO vehicle or CDK9i treatment groups, where \*\*\*\*  $p < 0.0001$ . **(C)** Heart rate (beats/minute) at 4 hpi, 6 hpi, 24 hpi and 48 hpi with 0.3% DMSO vehicle or 3 $\mu$ M FVP. Error bars = SEM,  $n = 15$  larvae, experimental  $n = 3$ . Two-way ANOVA and Bonferroni *post hoc* test performed for comparisons between DMSO vehicle or FVP treatment groups, where \*\*  $p < 0.01$  and \*\*\*\*  $p < 0.0001$ .

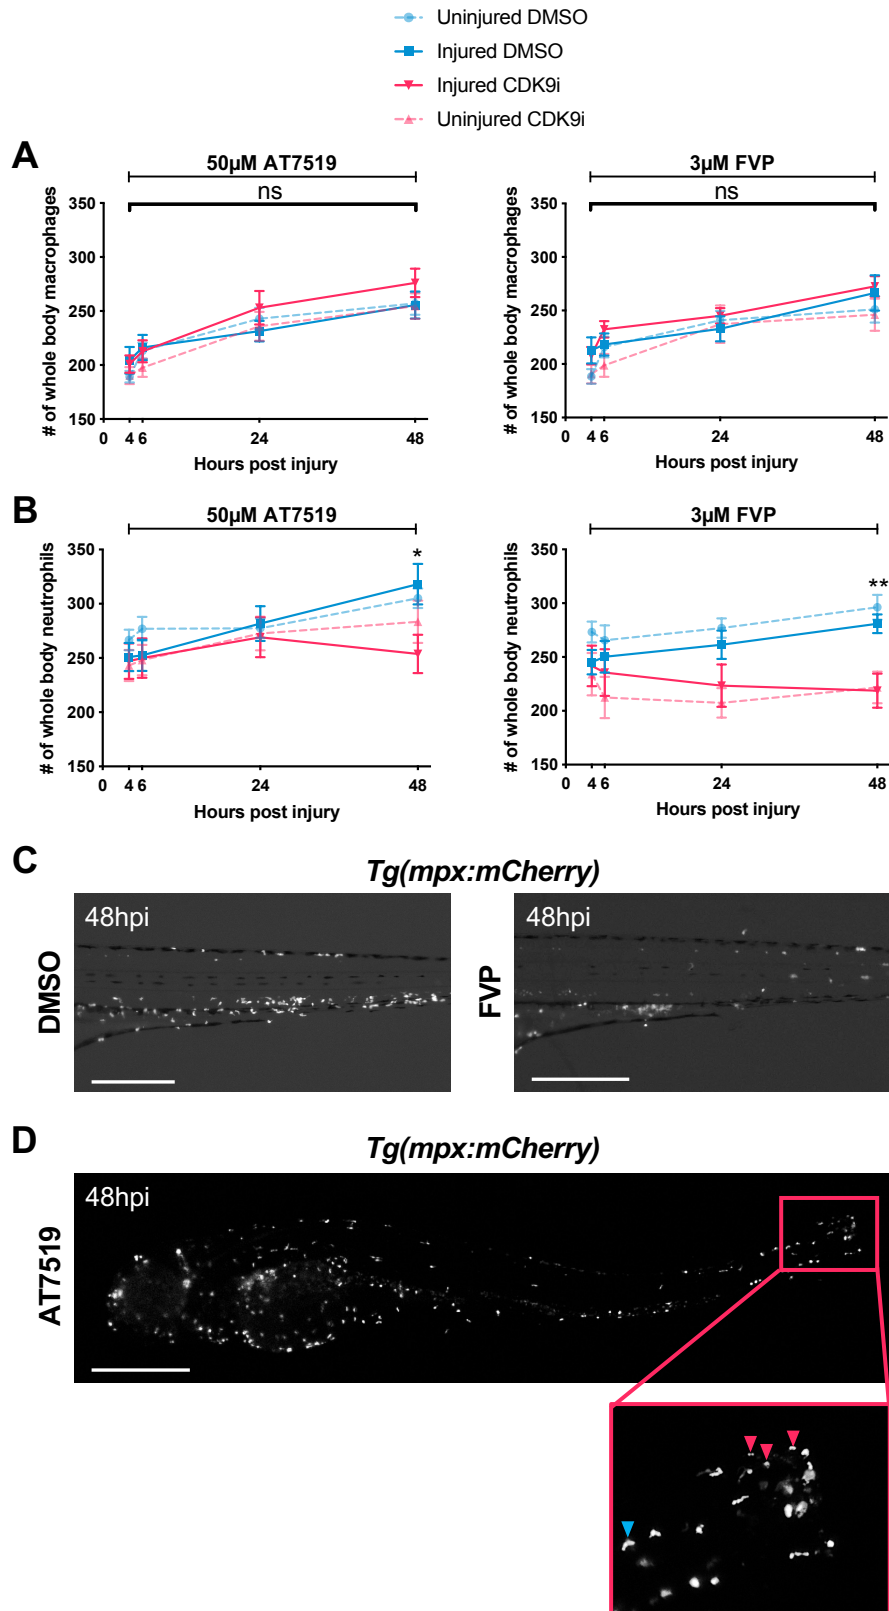

**Fig. S2. Continuous CDK9i treatment does not affect global macrophage numbers but causes neutropenia.** **(A)** Number of whole-body macrophages at 4 hpi, 6 hpi, 24 hpi and 48 hpi, with  $\leq 0.3\%$  DMSO vehicle, 50 $\mu\text{M}$  AT7519 (left graph) or 3 $\mu\text{M}$  FVP (right graph). Error bars = SEM,  $n = 18$  larvae, experimental  $n = 3$ . Two-way ANOVA and Bonferroni *post hoc* test performed for comparisons between DMSO vehicle or CDK9i treatment groups. Ns, non-significant. **(B)** Number of whole-body neutrophils at 4 hpi, 6 hpi, 24 hpi and 48 hpi with  $\leq 0.3\%$ , DMSO vehicle, 50 $\mu\text{M}$  AT7519 (left graph) or 3 $\mu\text{M}$  FVP (right graph). Error bars = SEM,  $n = 16$  larvae, experimental  $n = 3$ . Two-way ANOVA and Bonferroni *post hoc* test performed for comparisons between DMSO vehicle or CDK9i treatment groups, where \*  $p < 0.05$  and \*\*  $p < 0.01$ . **(C)** Epifluorescence image of *Tg(mpx:mCherry)* neutrophils within the caudal hematopoietic region at 48 hpi following treatment with 0.3% DMSO vehicle (left) or 3 $\mu\text{M}$  FVP (right). Scale bars = 300  $\mu\text{m}$ . **(D)** Epifluorescence image of *Tg(mpx:mCherry)* neutrophils within a whole larva at 48 hpi following treatment with 50 $\mu\text{M}$  AT7519. Scale bar = 500  $\mu\text{m}$ . Red panel indicates area of magnified view below whole larva image. Within magnified view: blue arrowhead indicates a normal migrating neutrophil and red arrowheads indicate condensed and rounded neutrophils.

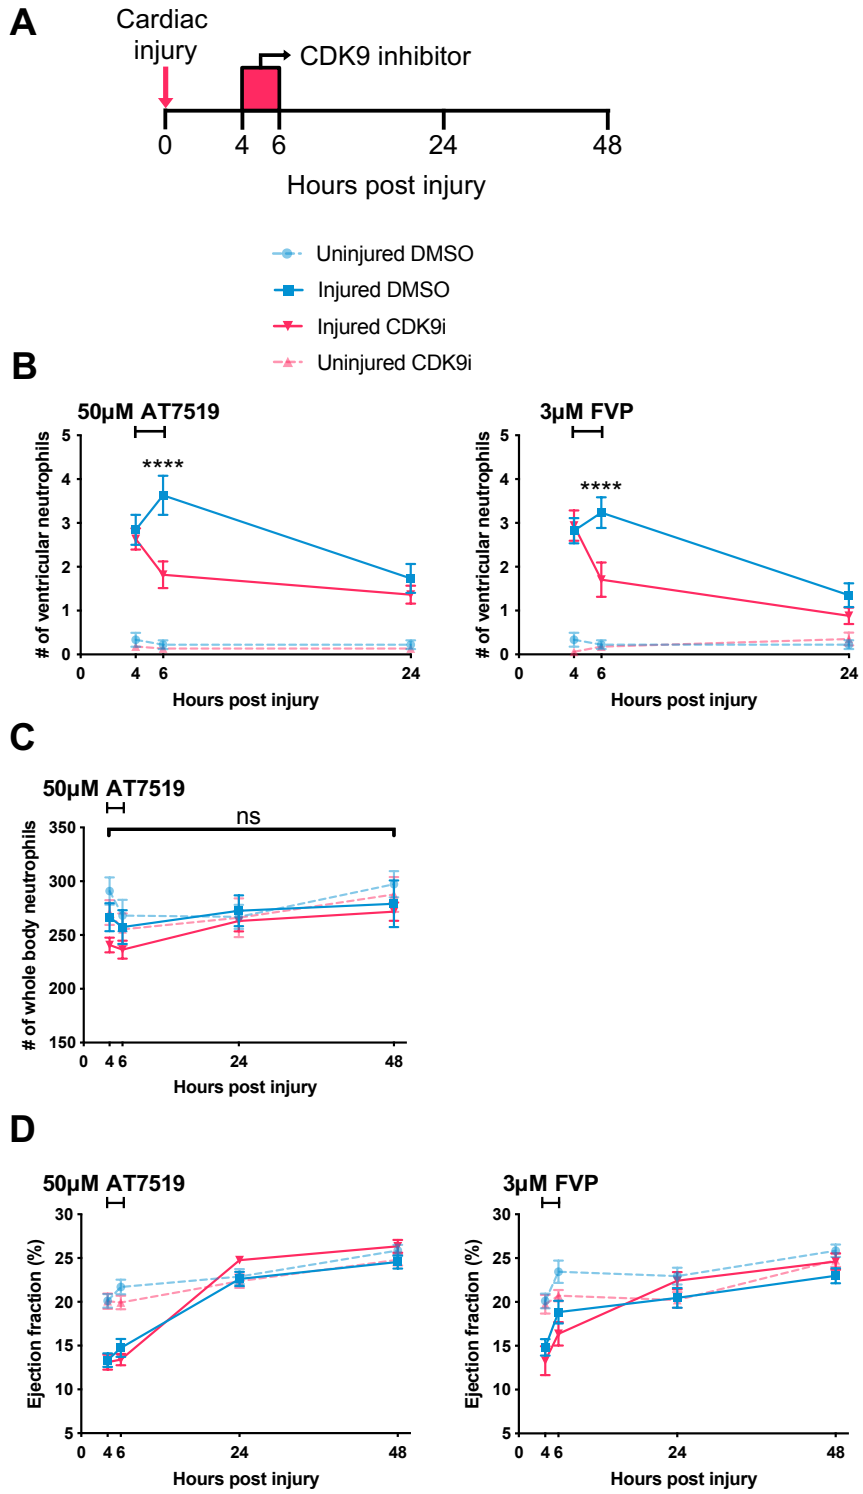

**Fig. S3. Transient CDK9i treatment resolves neutrophilic inflammation without causing neutropenia or impairing cardiac contractility.** **(A)** Experimental timeline indicating cardiac injury, transient CDK9i treatment and imaging timepoints. **(B)** Number of ventricular neutrophils at 4 hpi, 6 hpi and 24 hpi with 50 $\mu$ M AT7519 (left graph) or 3 $\mu$ M FVP (right graph) transient (pulsed) treatment. Error bars = SEM,  $n = 18$  larvae, experimental  $n = 3$ . Two-way ANOVA and Bonferroni *post hoc* test performed for comparisons between cardiac-injured DMSO vehicle or CDK9i treatment groups where \*\*\*\*  $p < 0.0001$ . **(C)** Number of whole-body neutrophils at 4 hpi, 6 hpi, 24 hpi and 48 hpi following transient treatment with 0.1% DMSO vehicle or 50 $\mu$ M AT7519. Error bars = SEM,  $n = 17$  larvae, experimental  $n = 3$ . Two-way ANOVA and Bonferroni *post hoc* test performed for comparisons between treatment groups. Ns, non-significant. **(D)** Ventricular ejection fraction (%) at 4 hpi, 6 hpi, 24 hpi and 48 hpi following transient treatment with  $\leq 0.3\%$  DMSO vehicle, 50 $\mu$ M AT7519 (left graph) or 3 $\mu$ M FVP (right graph). Error bars = SEM,  $n = 18$  larvae, experimental  $n = 3$ . Two-way ANOVA and Bonferroni *post hoc* test performed for comparisons between DMSO vehicle or CDK9i treatment groups. No statistical differences were observed between injured DMSO vehicle and CDK9i treatment groups across all timepoints.

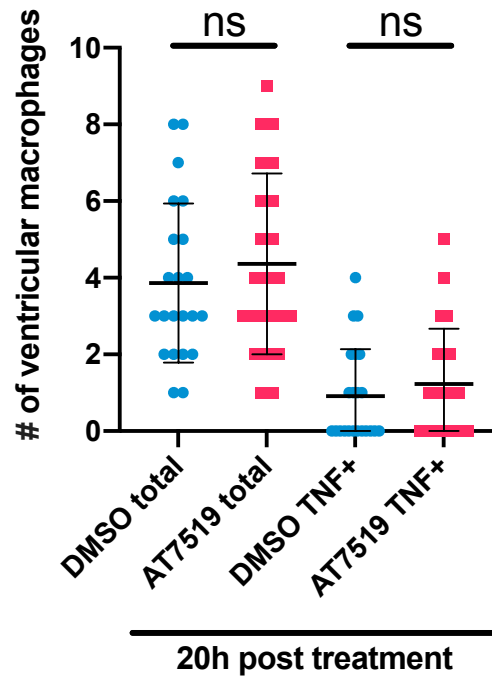

**Fig. S4. Transient AT7519 treatment does not polarise cardiac macrophages to a *tnf*<sup>+</sup> phenotype in uninjured larvae.** Number of ventricular macrophages (total and *tnf*<sup>+</sup>) at 20 hpt following transient treatment with 0.1% DMSO vehicle or 50 $\mu$ M AT7519 in uninjured larvae. Error bars = SD,  $n = 23$  larvae, experimental  $n = 3$ . One-way ANOVA and Tukey *post hoc* test performed for comparisons between treatment groups. Ns, non-significant.

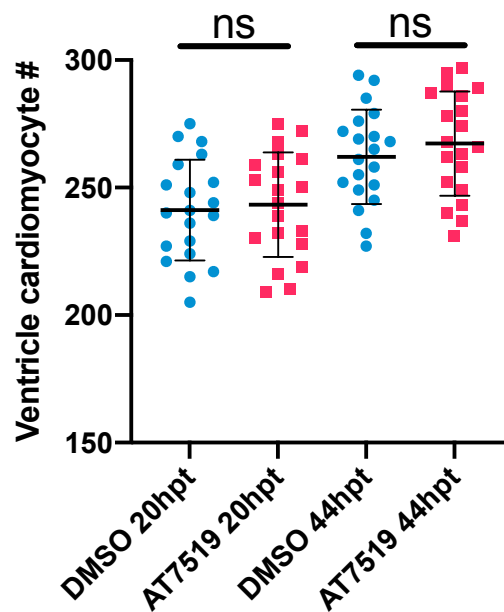

**Fig. S5. Transient AT7519 treatment does not enhance cardiomyocyte number expansion in uninjured larvae.** Number of ventricular cardiomyocytes in uninjured larvae at 24 hpt and 48 hpt following transient treatment with 0.1% DMSO vehicle or 50 $\mu$ M AT7519. Error bars = SD,  $n = 21$  larvae, experimental  $n = 3$ . One-way ANOVA and Tukey *post hoc* test performed for comparisons between treatment groups. Ns, non-significant.

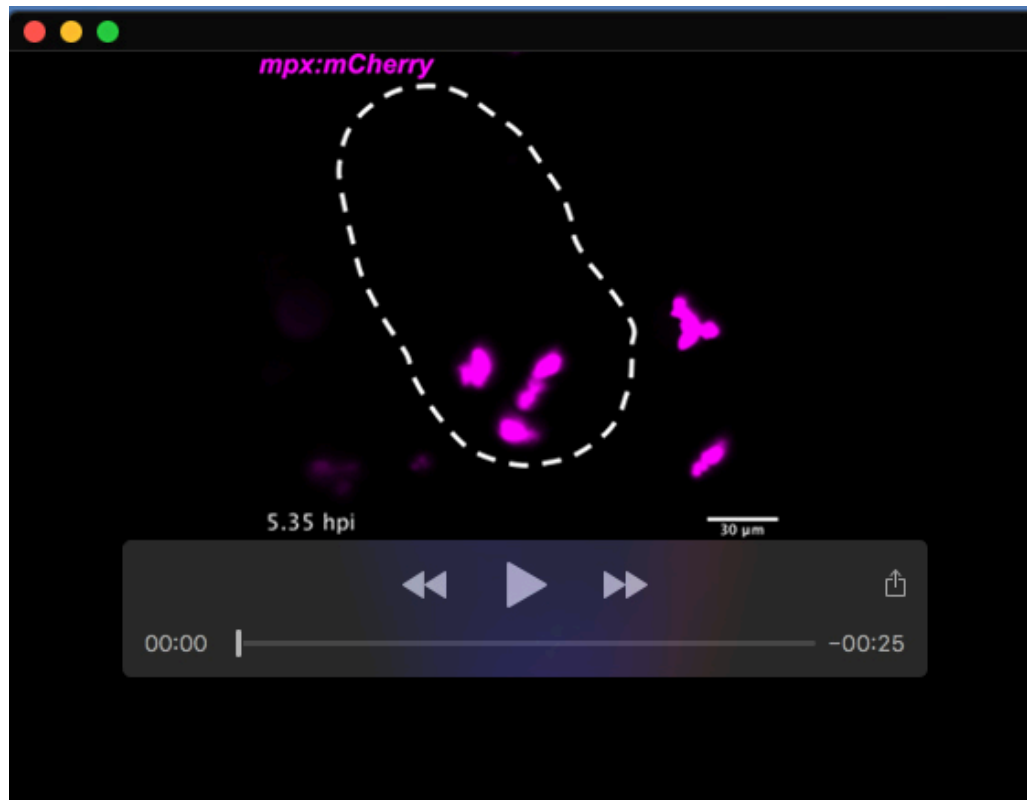

**Movie 1. Neutrophil infiltration following cardiac injury with DMSO vehicle**

LSFM heartbeat-synchronised timelapse of a *Tg(mpx:mCherry)* larva treated with DMSO vehicle showing neutrophils infiltrating the cardiac injury site between 4 and 6 hpi. 3D images are displayed as maximum intensity projections. Dotted line indicates outline of ventricle.



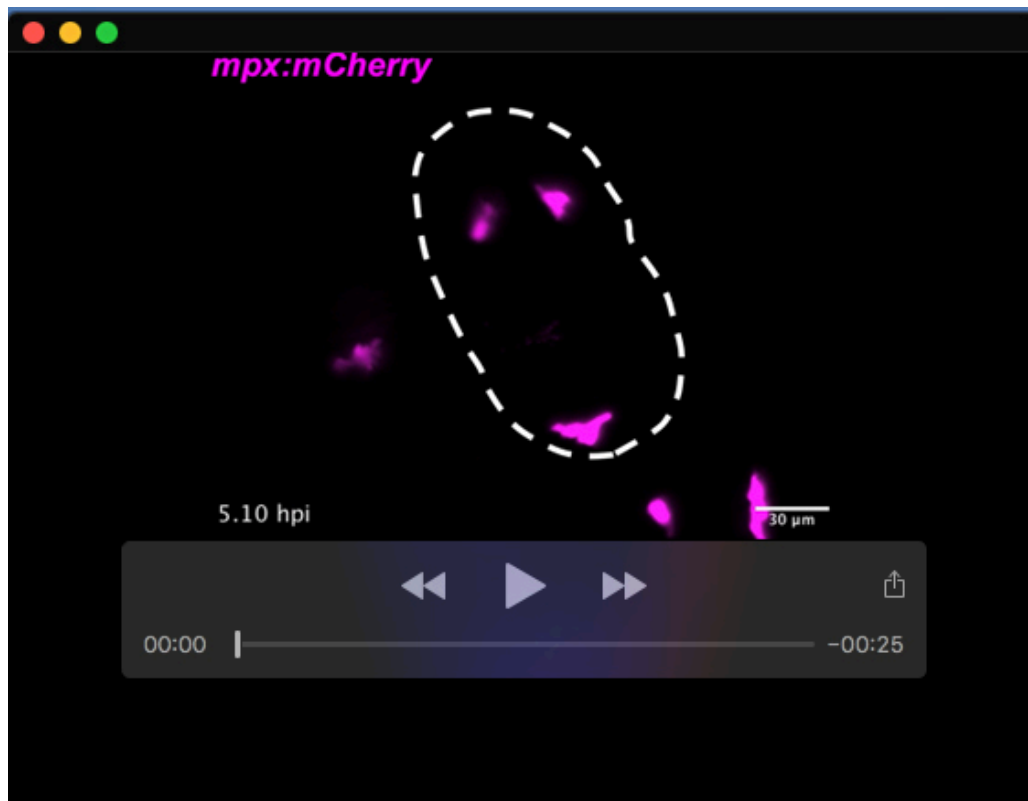

**Movie 2. Neutrophil reverse migration following cardiac injury with AT7519**  
LSFM heartbeat-synchronised timelapse of a *Tg(mpx:mCherry)* larva treated with AT7519 showing wound-recruited neutrophils undergoing reverse migration from the injured heart between 4 and 6 hpi. 3D images are displayed as maximum intensity projections. Dotted line indicates outline of ventricle.

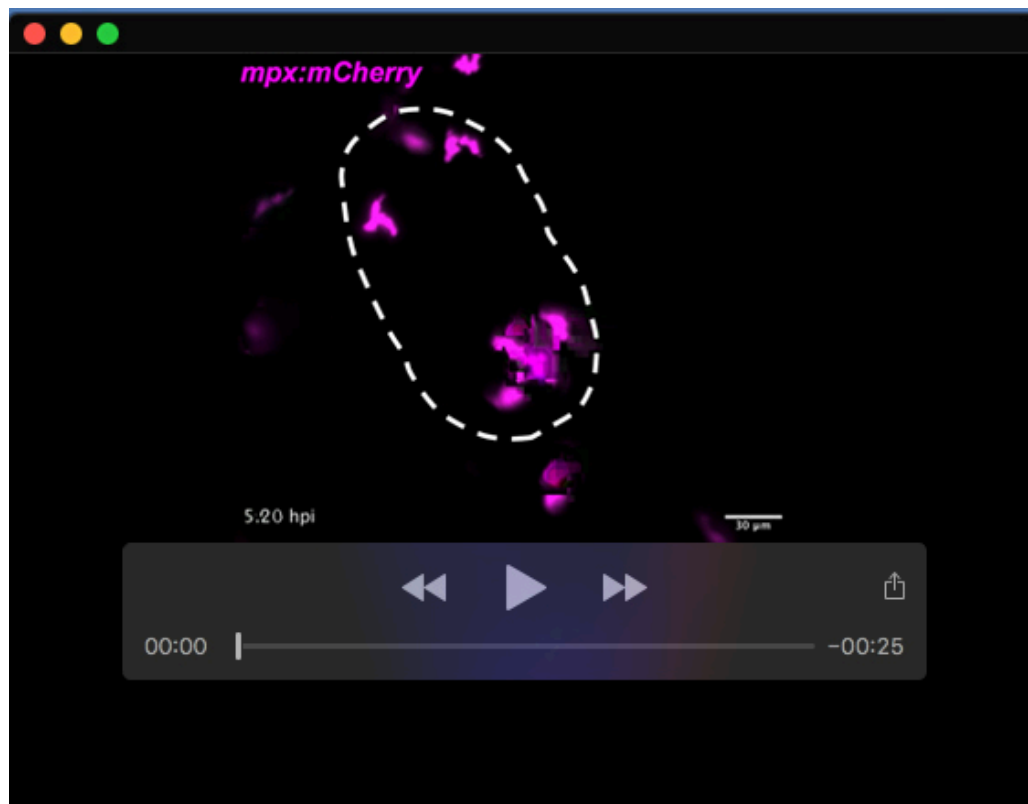

**Movie 3. Neutrophil reverse migration following cardiac injury with Flavopiridol**

LSFM heartbeat-synchronised timelapse of a *Tg(mpx:mCherry)* larva treated with Flavopiridol showing wound-recruited neutrophils undergoing reverse migration from the injured heart between 4 and 6 hpi. 3D images are displayed as maximum intensity projections. Dotted line indicates outline of ventricle.

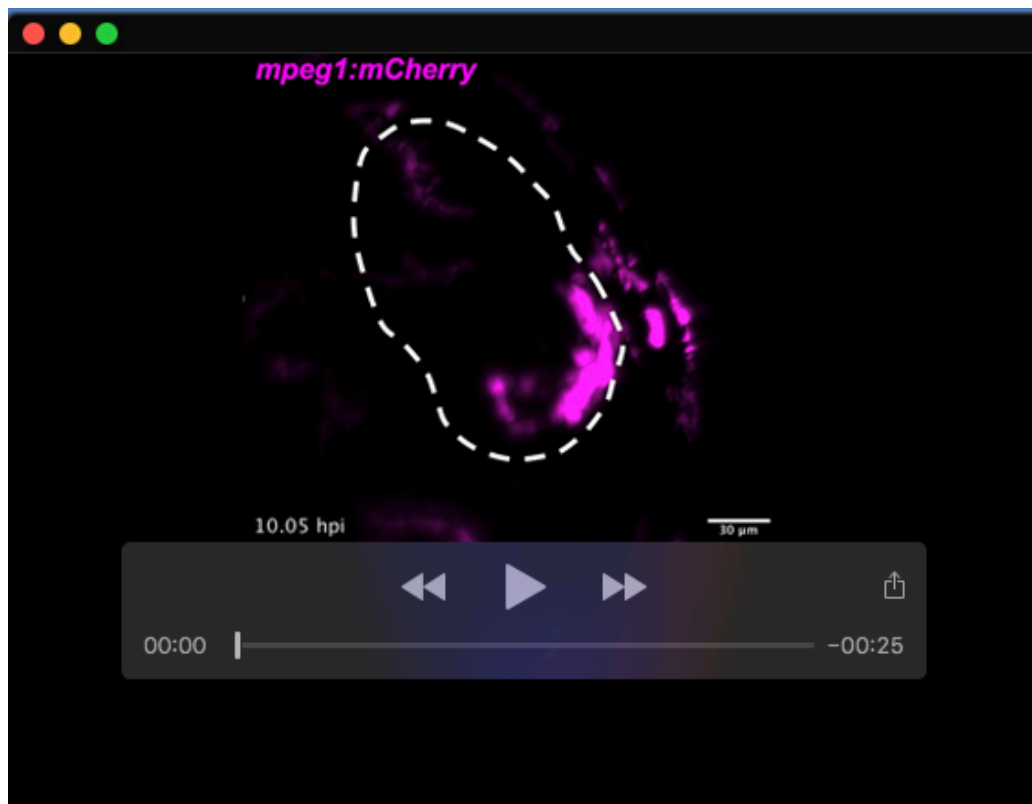

**Movie 4. Macrophage wound retention following cardiac injury with DMSO vehicle**  
LSFM heartbeat-synchronised timelapse of a *Tg(mpeg1:mCherry)* larva treated with DMSO vehicle showing wound-recruited macrophages being retained on the injured heart between 4 and 20 hpi. 3D images are displayed as maximum intensity projections. Dotted line indicates outline of ventricle.

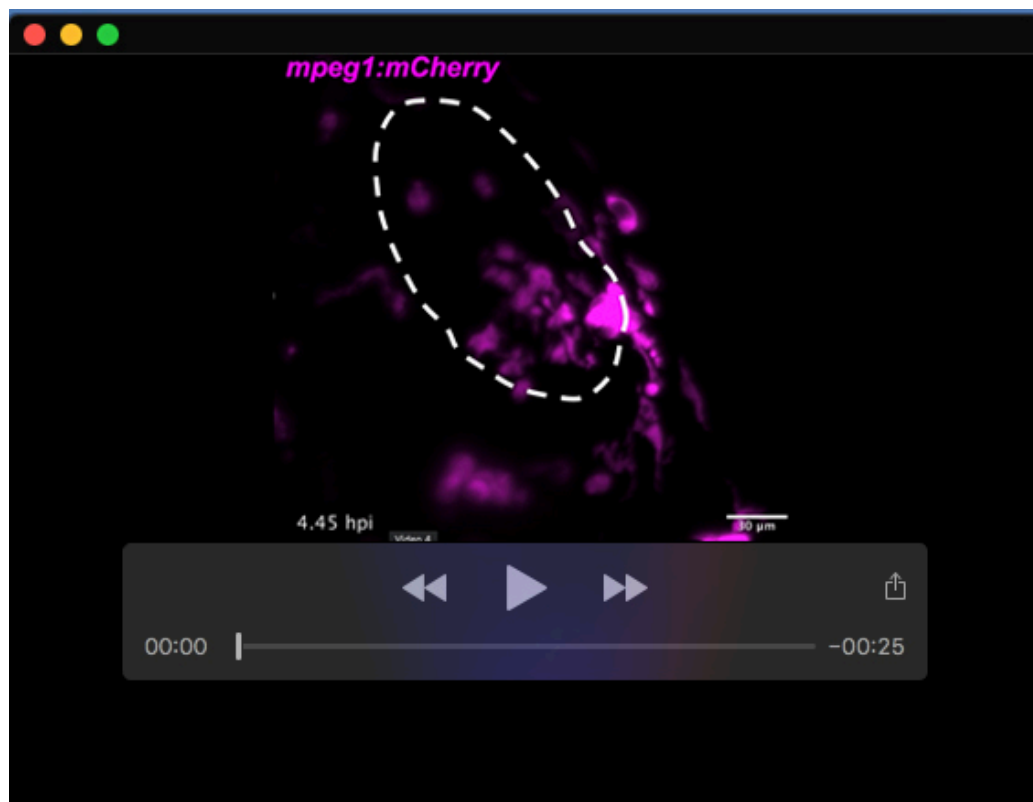

**Movie 5. Macrophage reverse migration following cardiac injury with Flavopiridol**  
LSFM heartbeat-synchronised timelapse of a *Tg(mpeg1:mCherry)* larva treated with Flavopiridol showing wound-recruited macrophages undergoing reverse migration from the injured heart between 4 and 21 hpi. 3D images are displayed as maximum intensity projections. Dotted line indicates outline of ventricle.

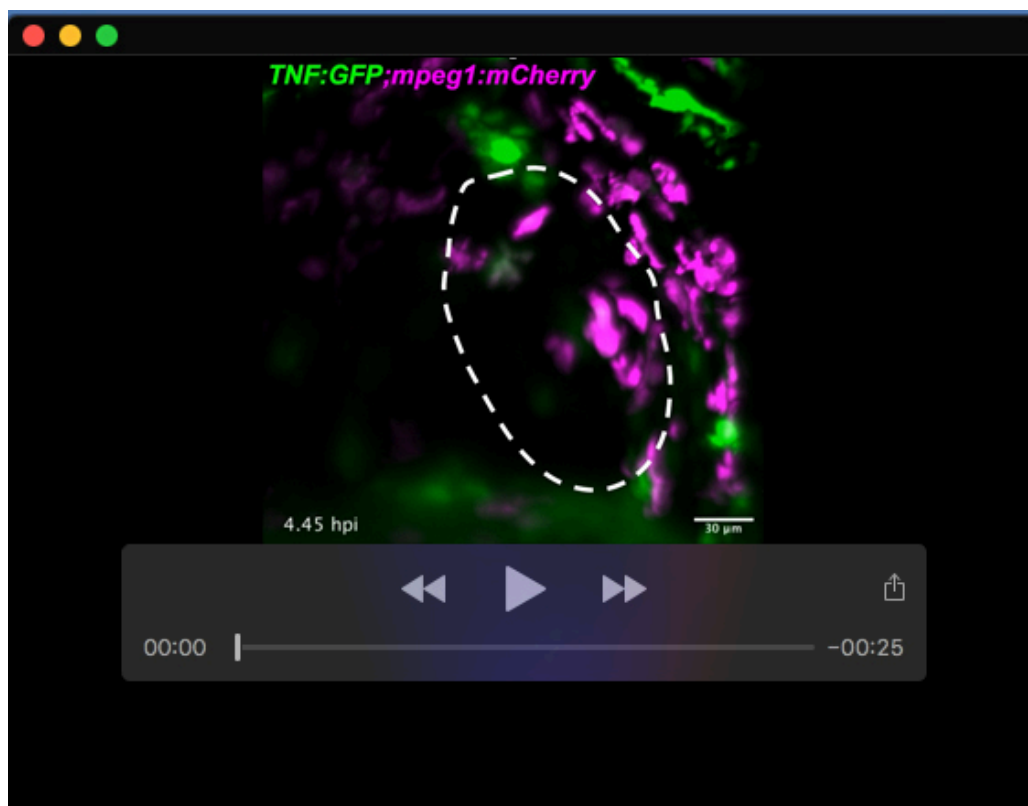

**Movie 6. Wound-associated macrophages upregulate *tnf* expression following cardiac injury**

LSFM heartbeat-synchronised timelapse of a *Tg(mpeg1:mCherry;TNFa:GFP)* larva showing wound-adjacent macrophages upregulating *tnf* expression at the cardiac injury site between 4 and 15 hpi. 3D images are displayed as maximum intensity projections. Dotted line indicates outline of ventricle.

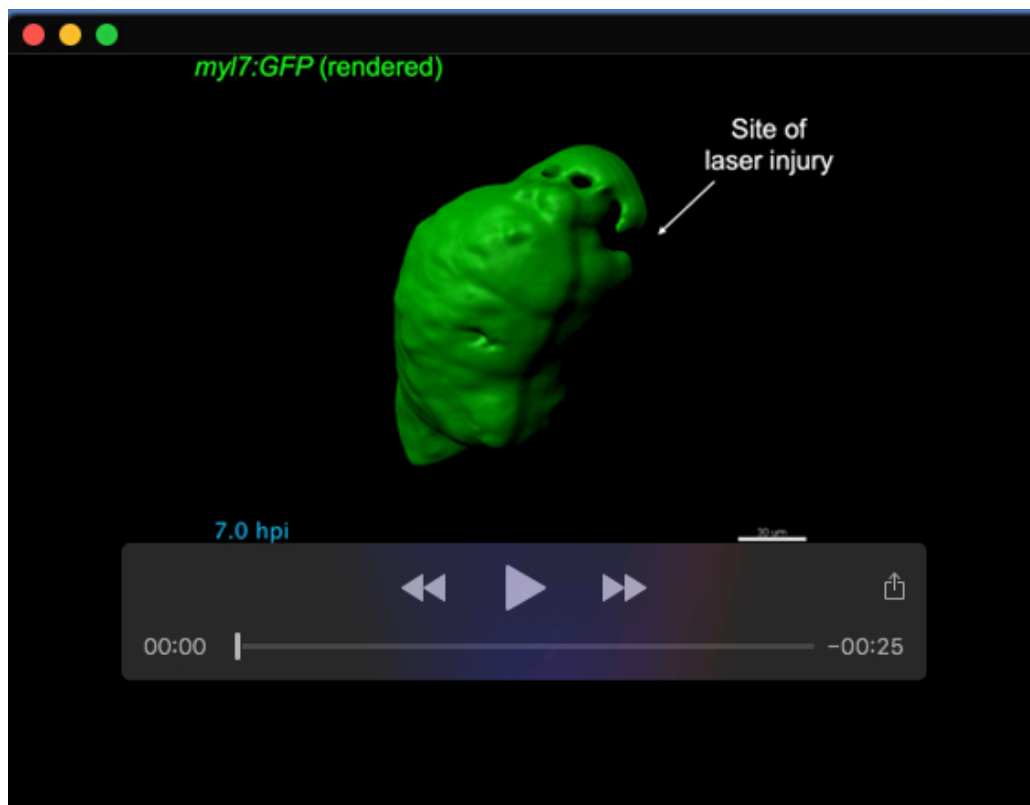

**Movie 7. Myocardial regeneration via cardiomyocyte protrusion and bridging following cardiac injury**

LSFM heartbeat-synchronised timelapse of a *Tg(myl7:GFP)* larva showing myocardial regeneration occurring via cardiomyocyte protrusion and bridging between 6 and 17 hpi. 3D images were surface rendered.
